# Supplementary material
Source: publisher figshare collection journal article supplement (https://acs.figshare.com/ndownloader/files/14730272)
Supplement: Supplementary file 1 [file 14730272]

2-(Tetrahydrofuran-2-yl)acetic Acid and Ester Derivatives as Long-range  
Pollinator Attractants in the Sexually Deceptive Orchid *Cryptostylis ovata*

Björn Bohman, Alyssa M. Weinstein, Ryan D. Phillips, Rod Peakall, and Gavin R. Flematti<sup>†</sup>

## Supporting Information

**Figure S1.**  $^1\text{H}$  NMR spectrum of the isolated compound from *C. ovata* after HPLC purification (d<sub>4</sub>-MeOH, 1.7 mm probe)

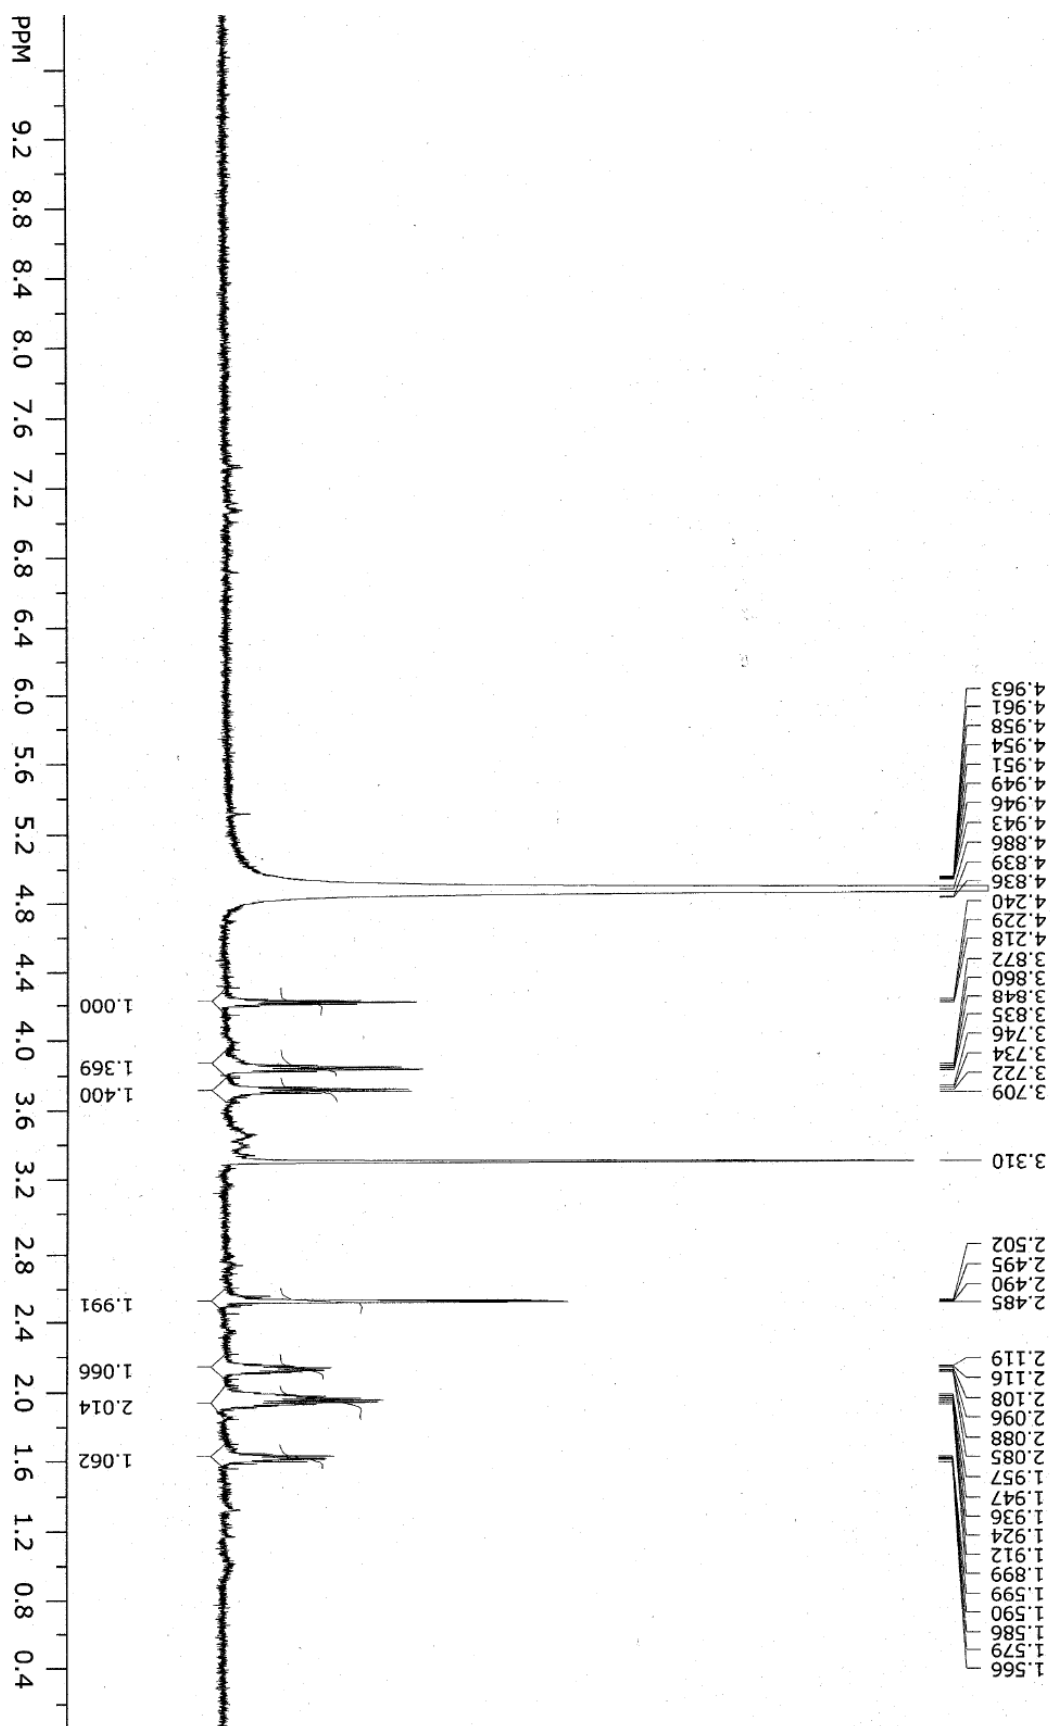

**Figure S2.** Expansion of the  $^1\text{H}$  NMR spectrum of the isolated compound from *C. ovata* after HPLC purification (d4-MeOH, 1.7 mm probe)

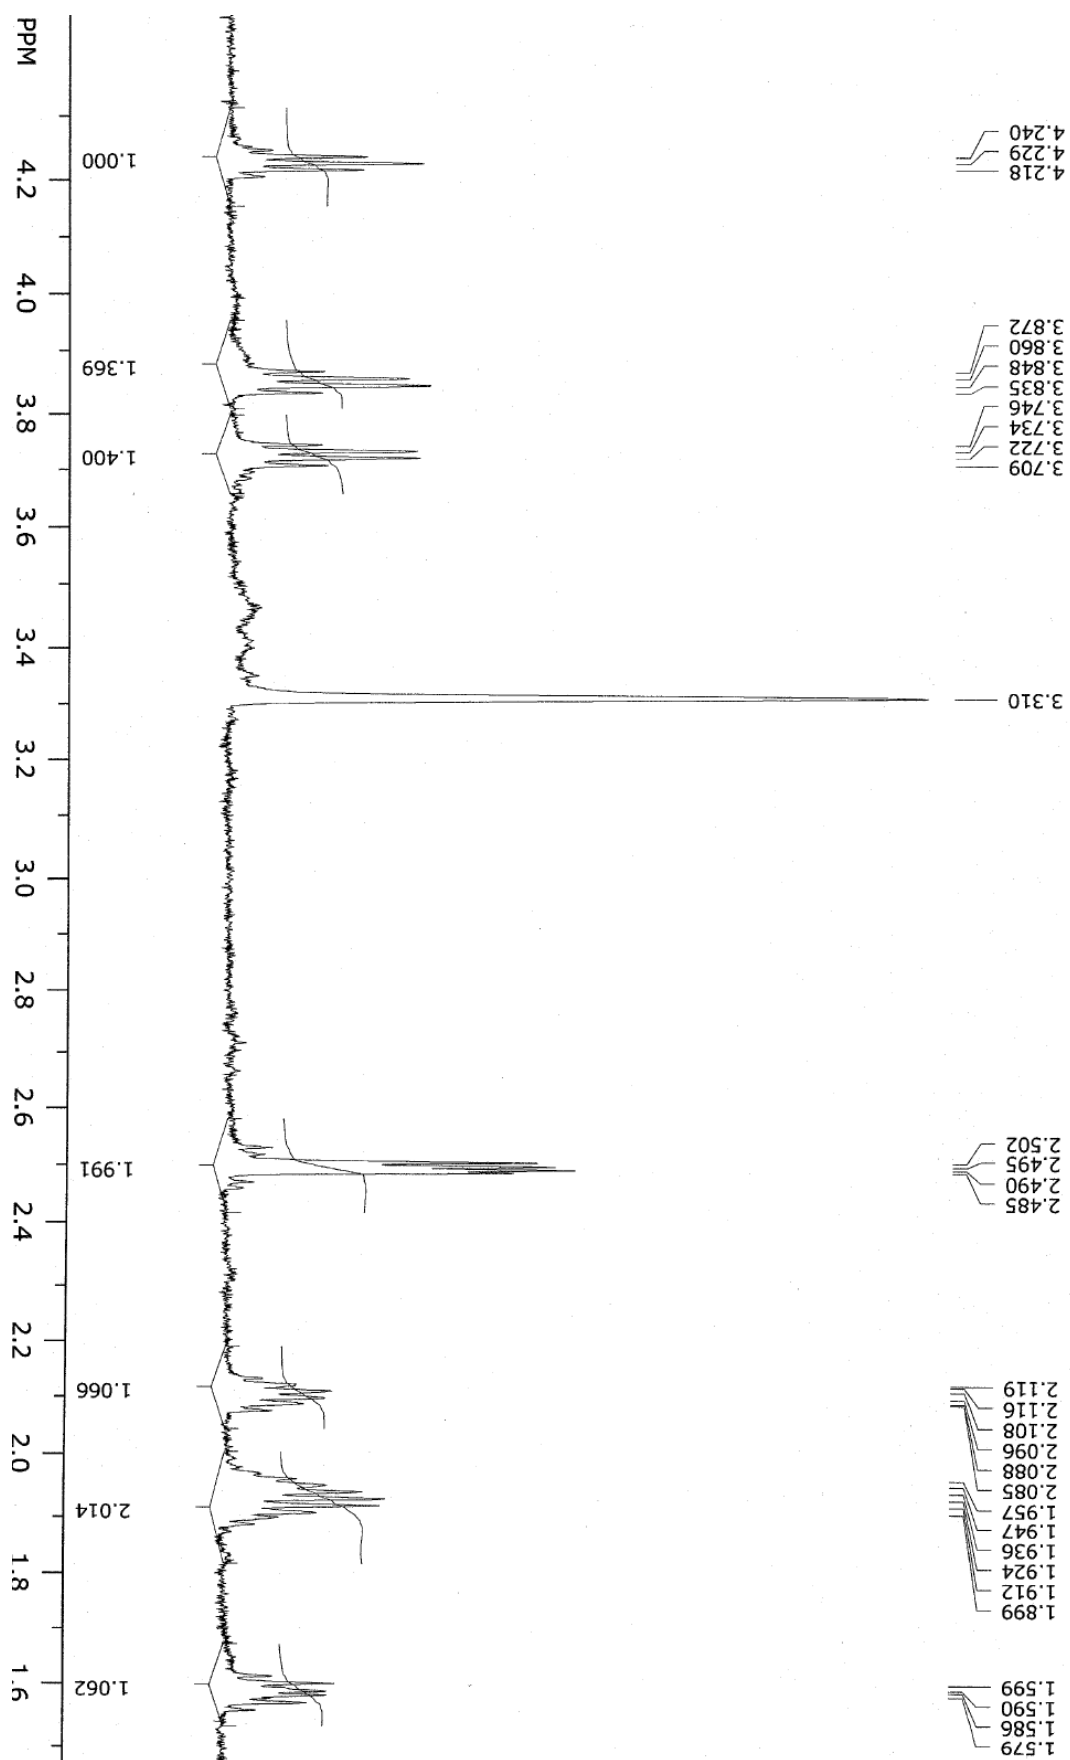

**Figure S3.**  $^{13}\text{C}$  NMR spectrum of the isolated compound from *C. ovata* after HPLC purification (d4-MeOH, 1.7 mm probe)

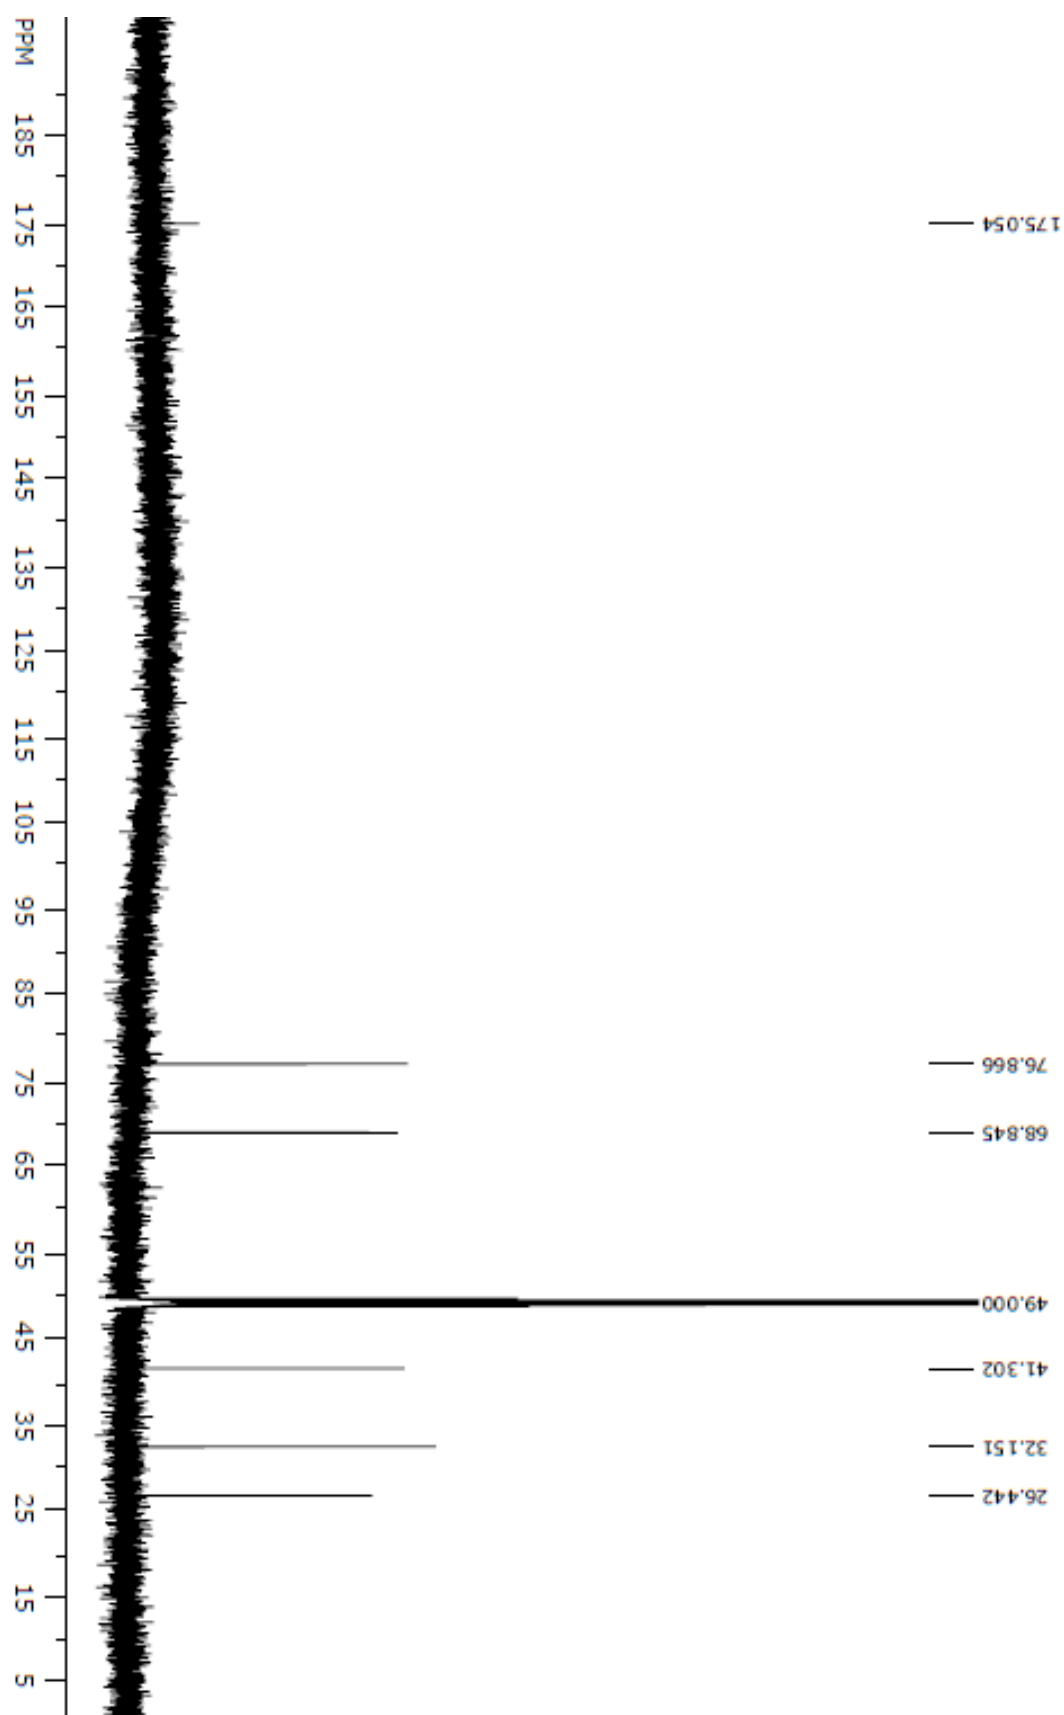

**Figure S4.** Isolated compound from *C. ovata* after HPLC purification (d4-MeOH, 1.7 mm probe, HSQC)

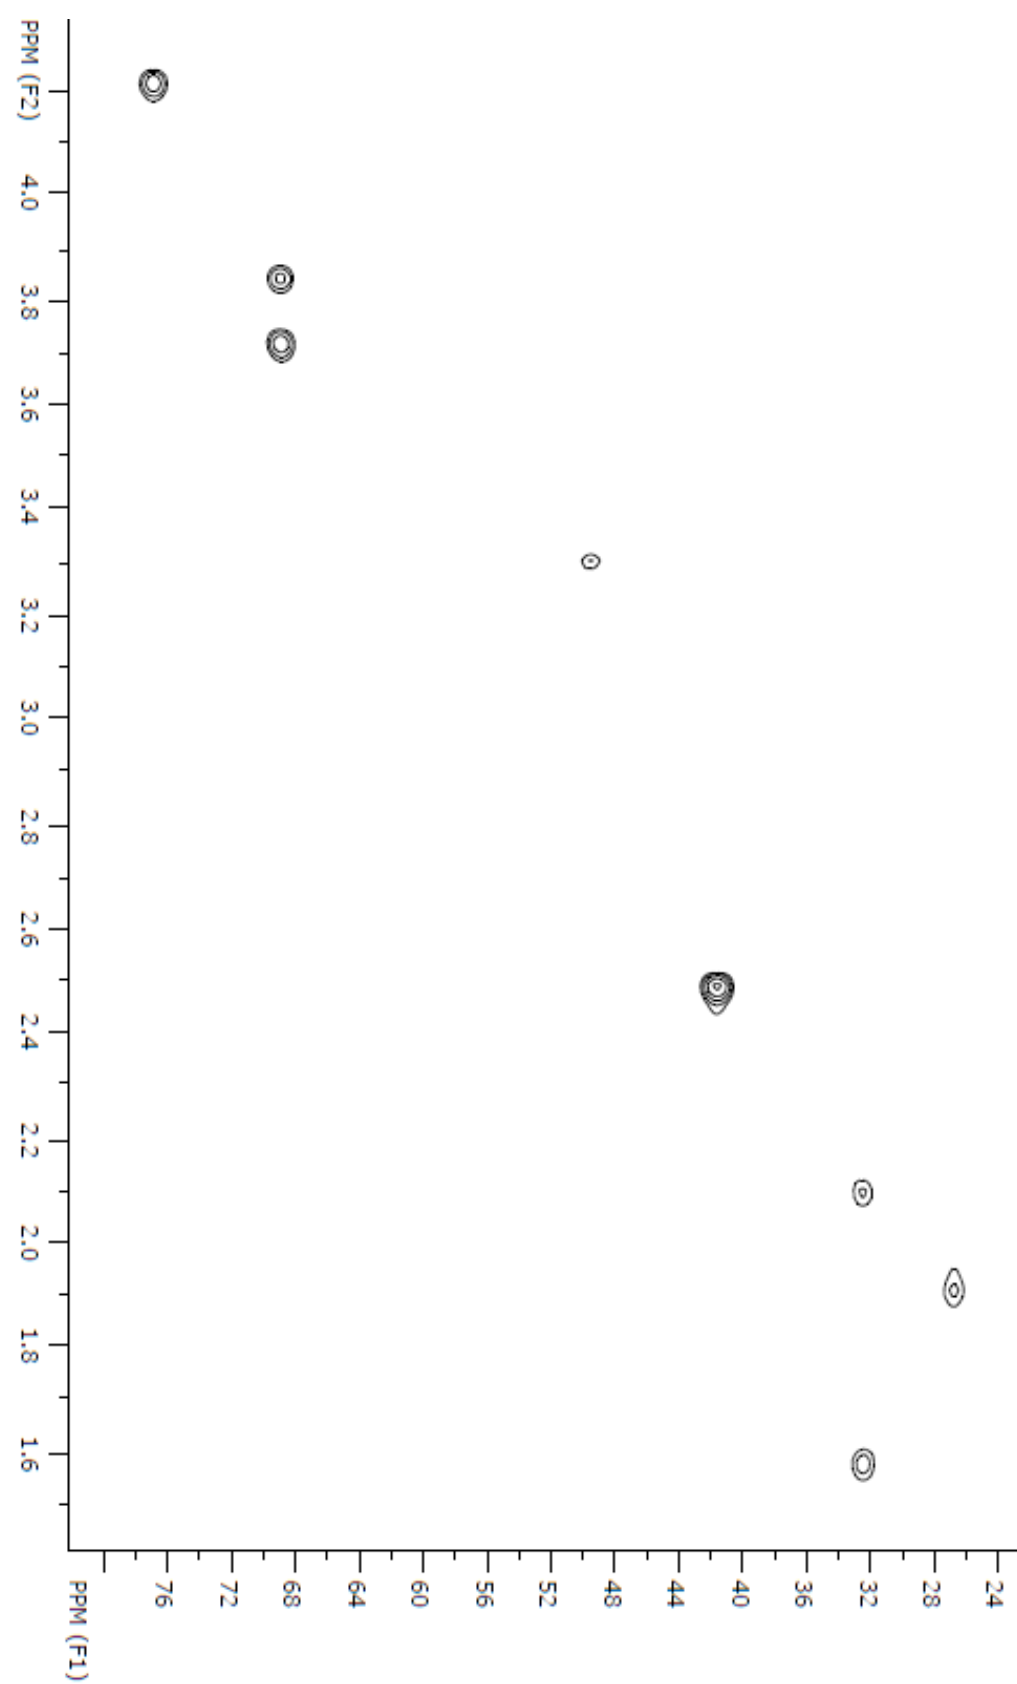

**Figure S5.** Isolated compound from *C. ovata* after HPLC purification (d4-MeOH, 1.7 mm probe, HMBC)

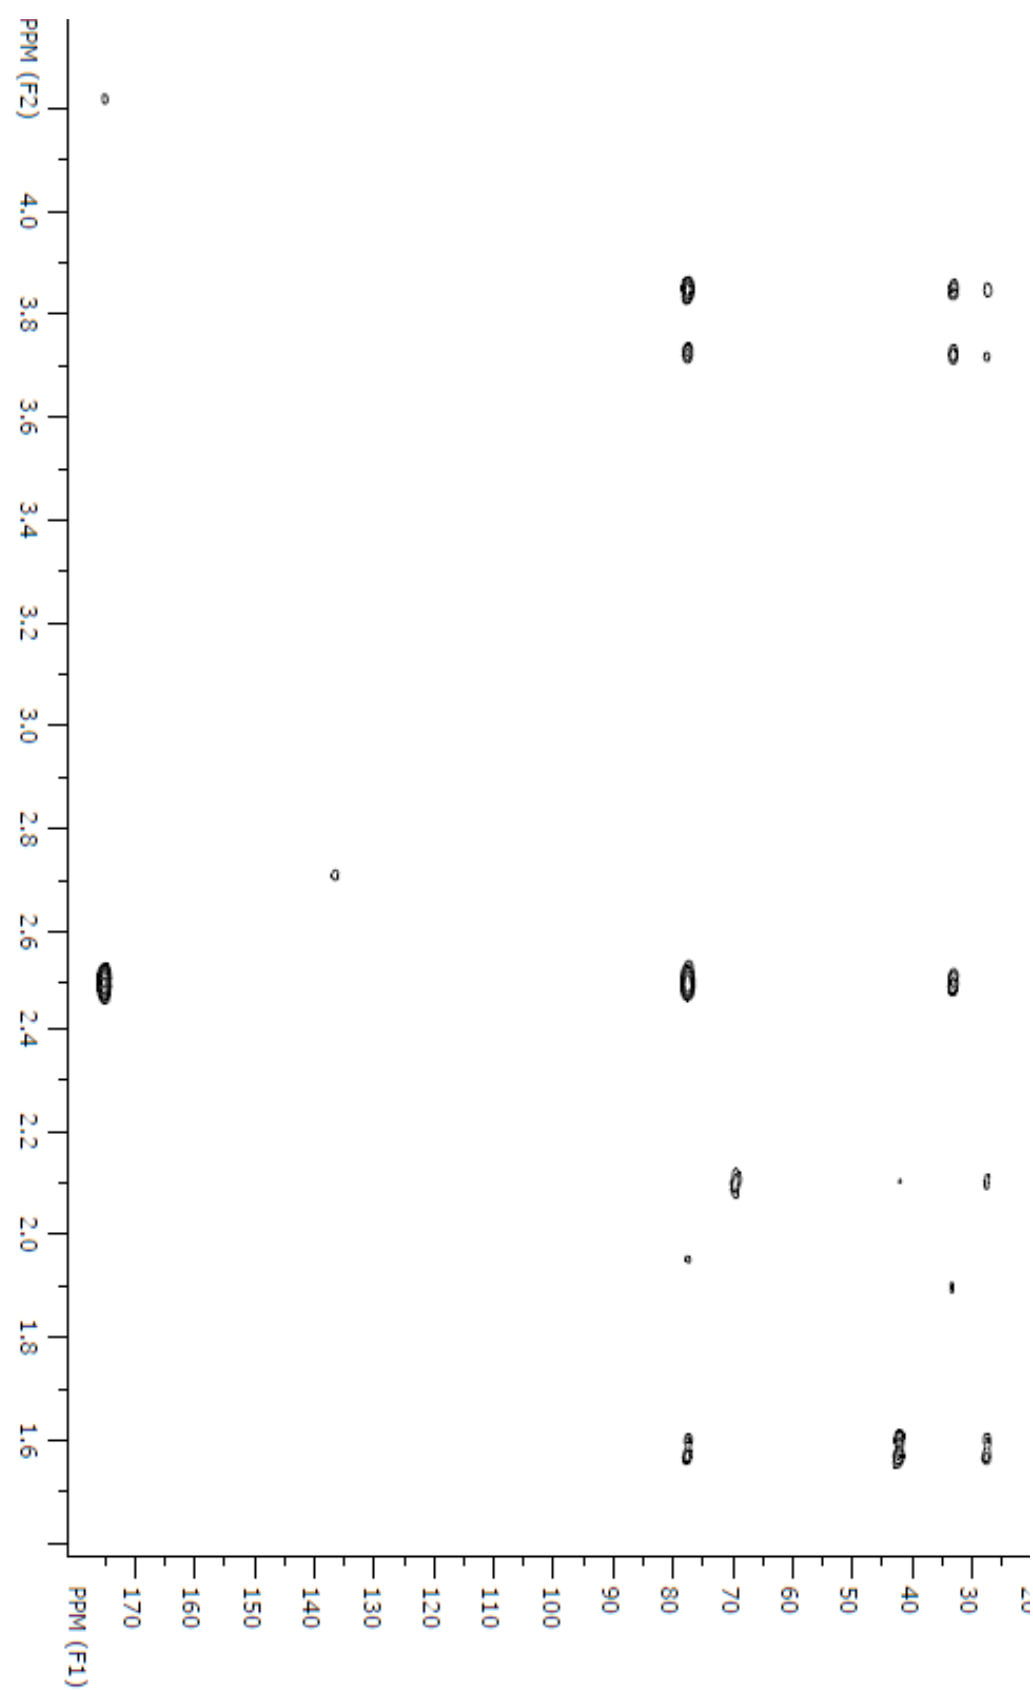

**Figure S6.** Isolated compound from *C. ovata* after HPLC purification (d4-MeOH, 1.7mm probe, COSY)

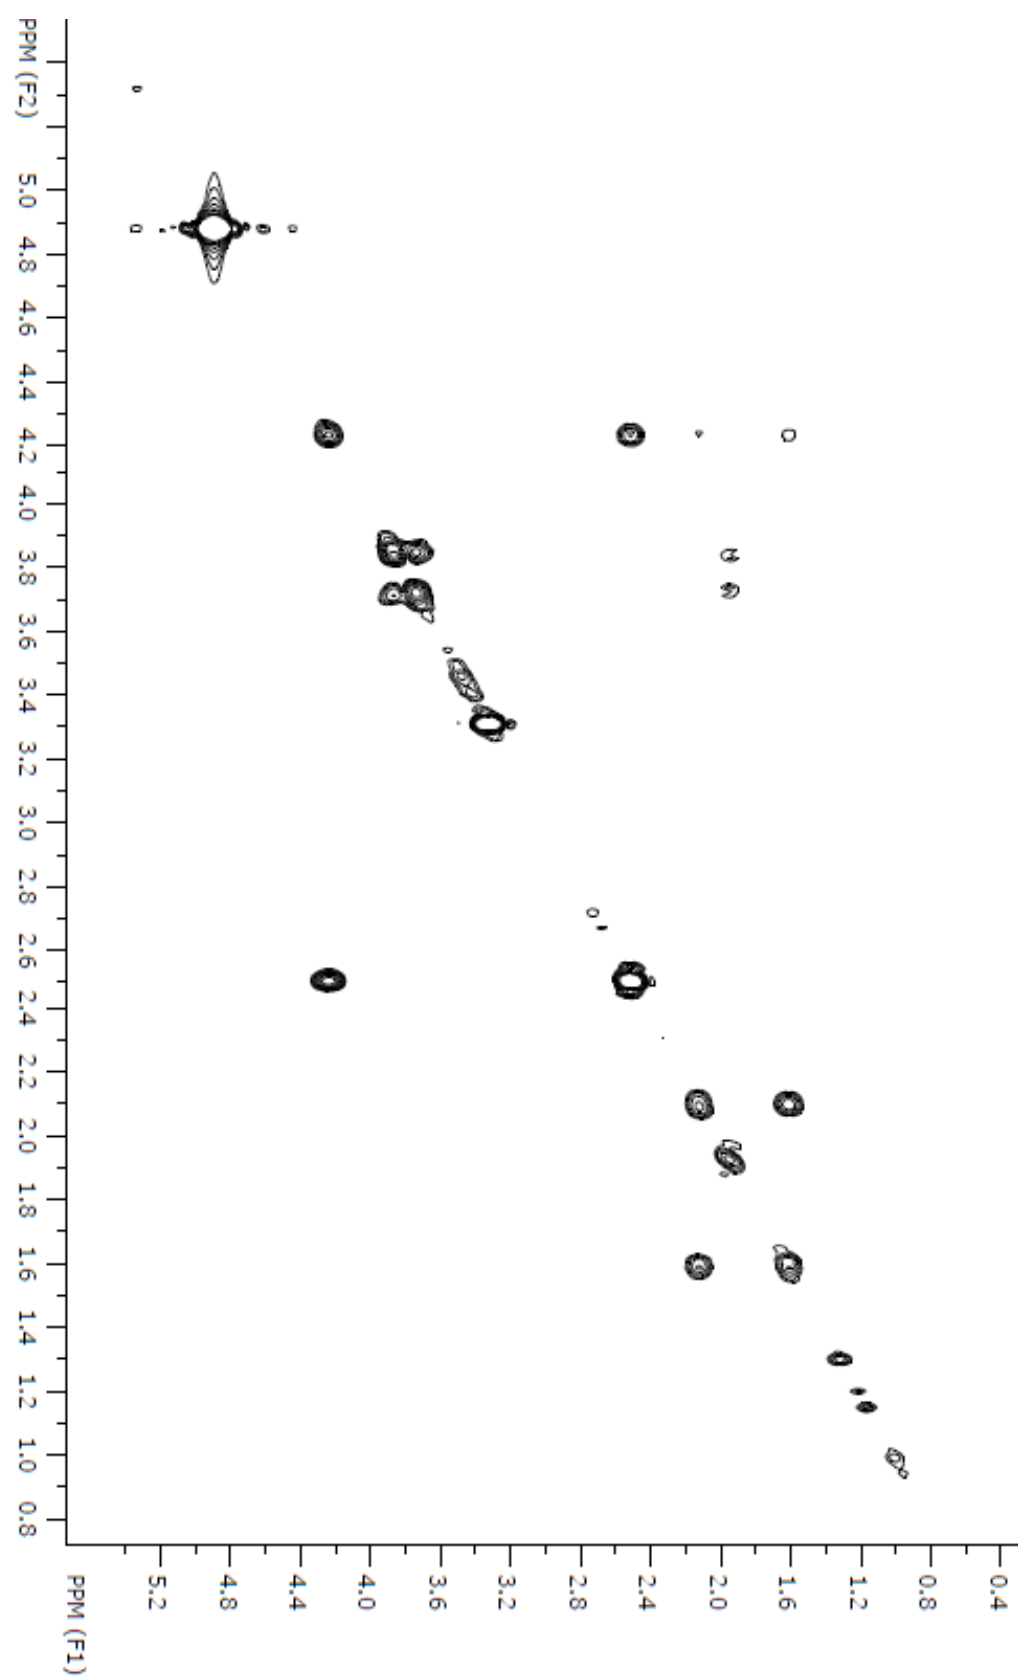

Figure S7.  $^1\text{H}$  NMR spectrum of (*S*)-**2** ( $\text{CDCl}_3$ )

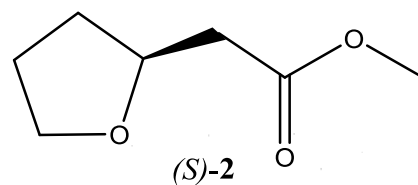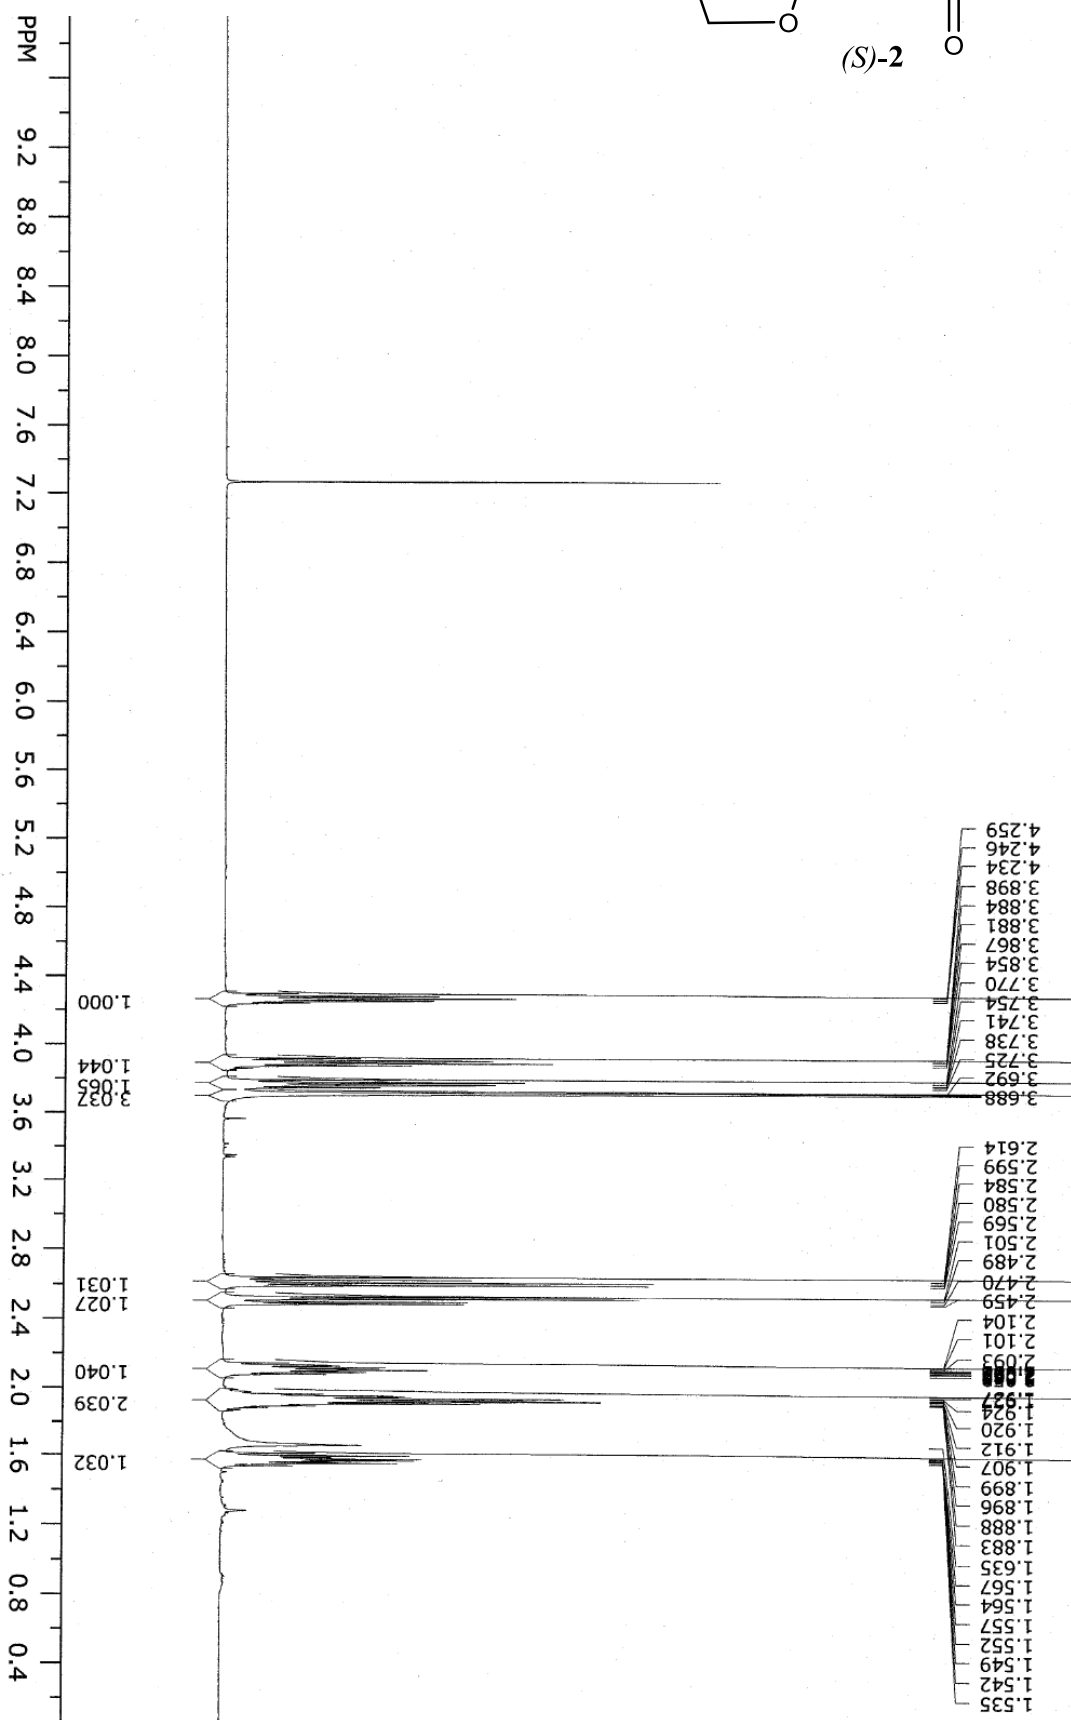



**Figure S8.**  $^{13}\text{C}$  NMR spectrum of (*S*)-**2** ( $\text{CDCl}_3$ )

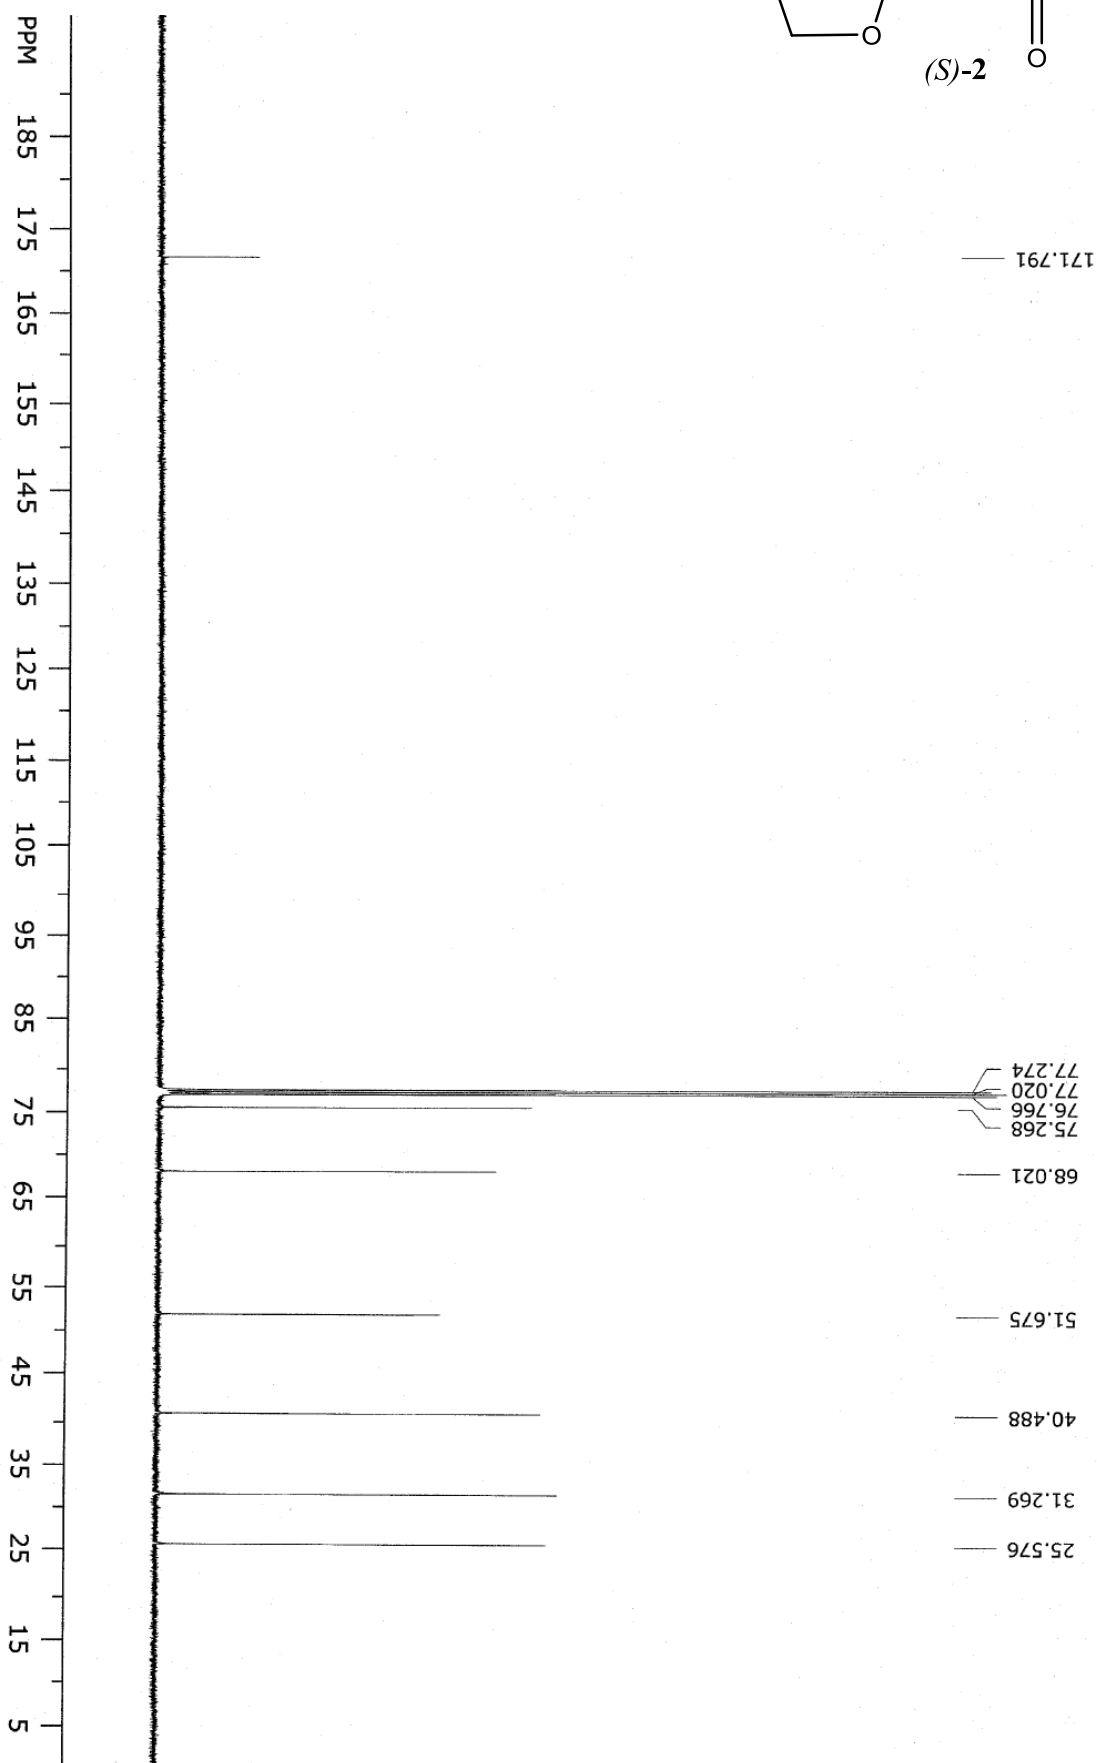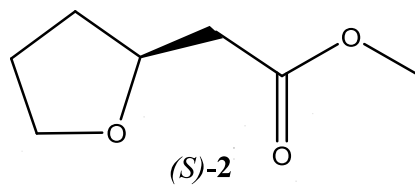

**Figure S9.**  $^1\text{H}$  NMR spectrum of (*S*)-**3** ( $\text{CDCl}_3$ )

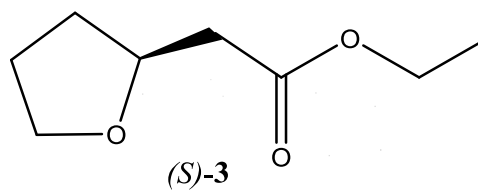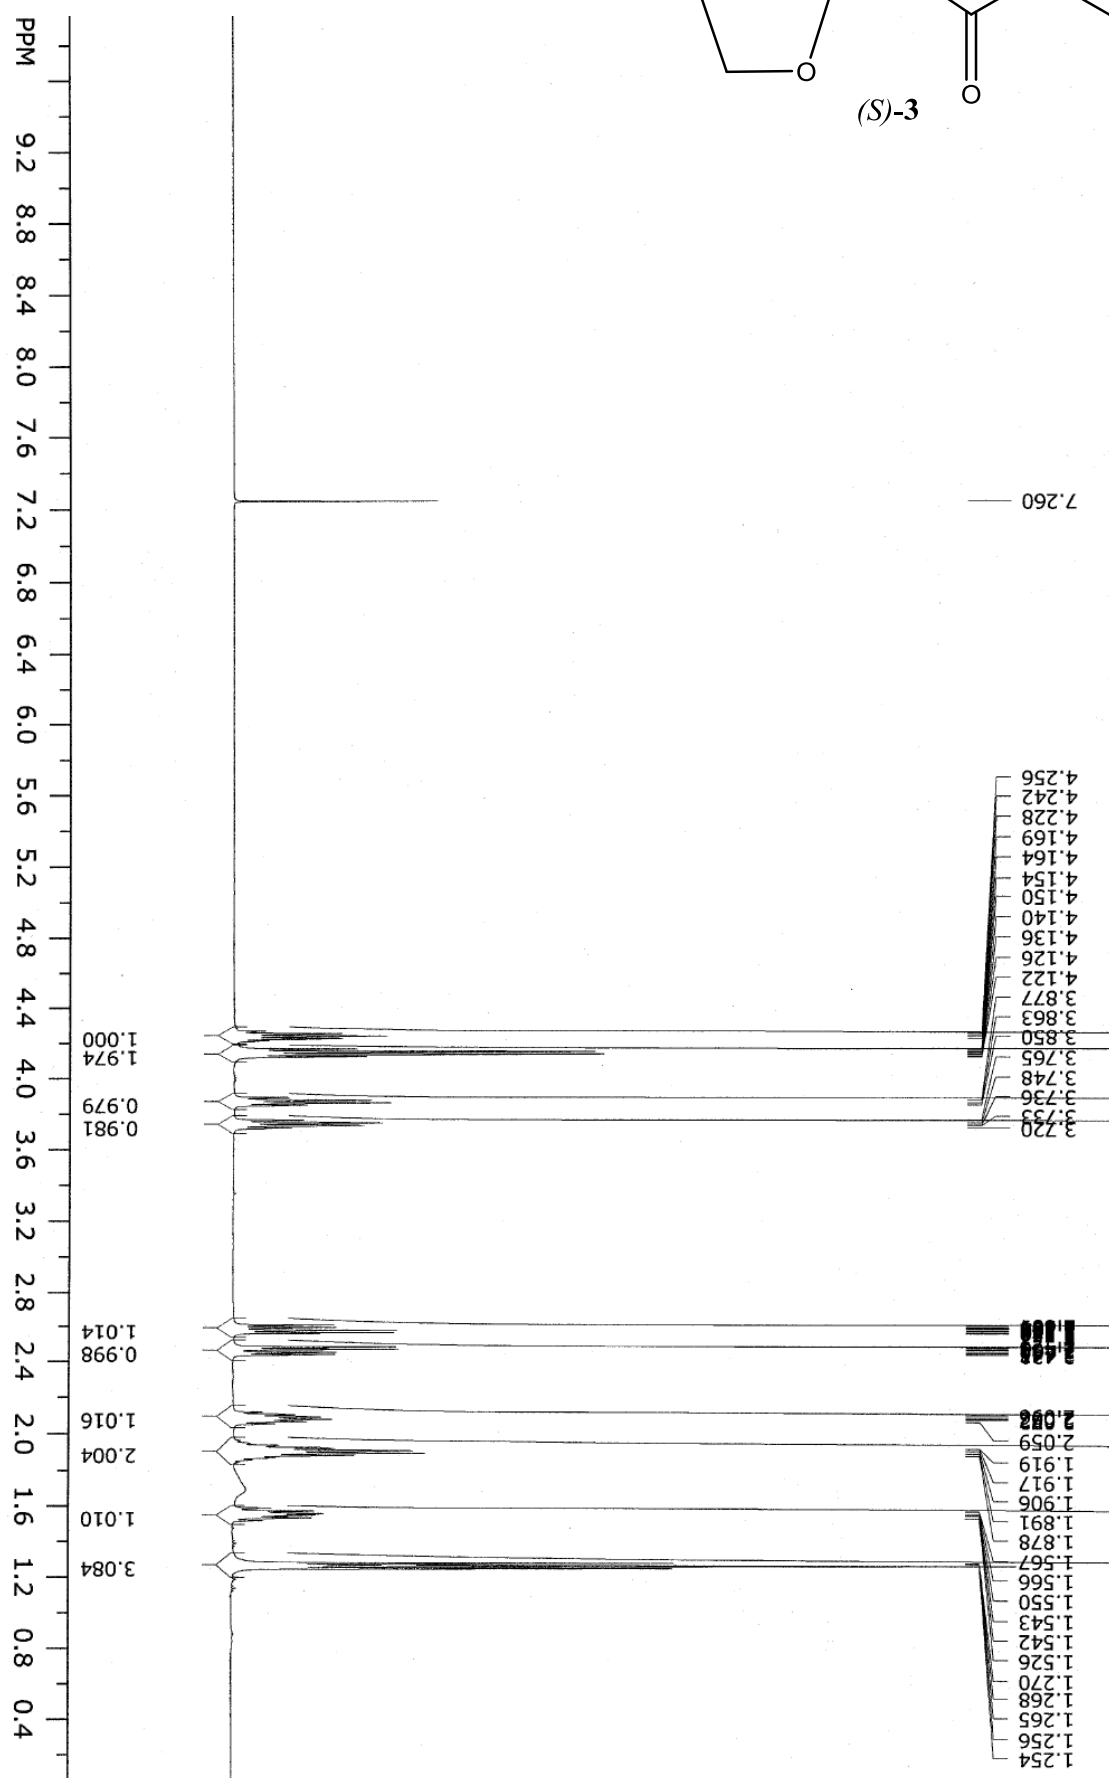

**Figure S10.**  $^1\text{H}$  NMR spectrum of (*S*)-**3** ( $\text{CDCl}_3$ )

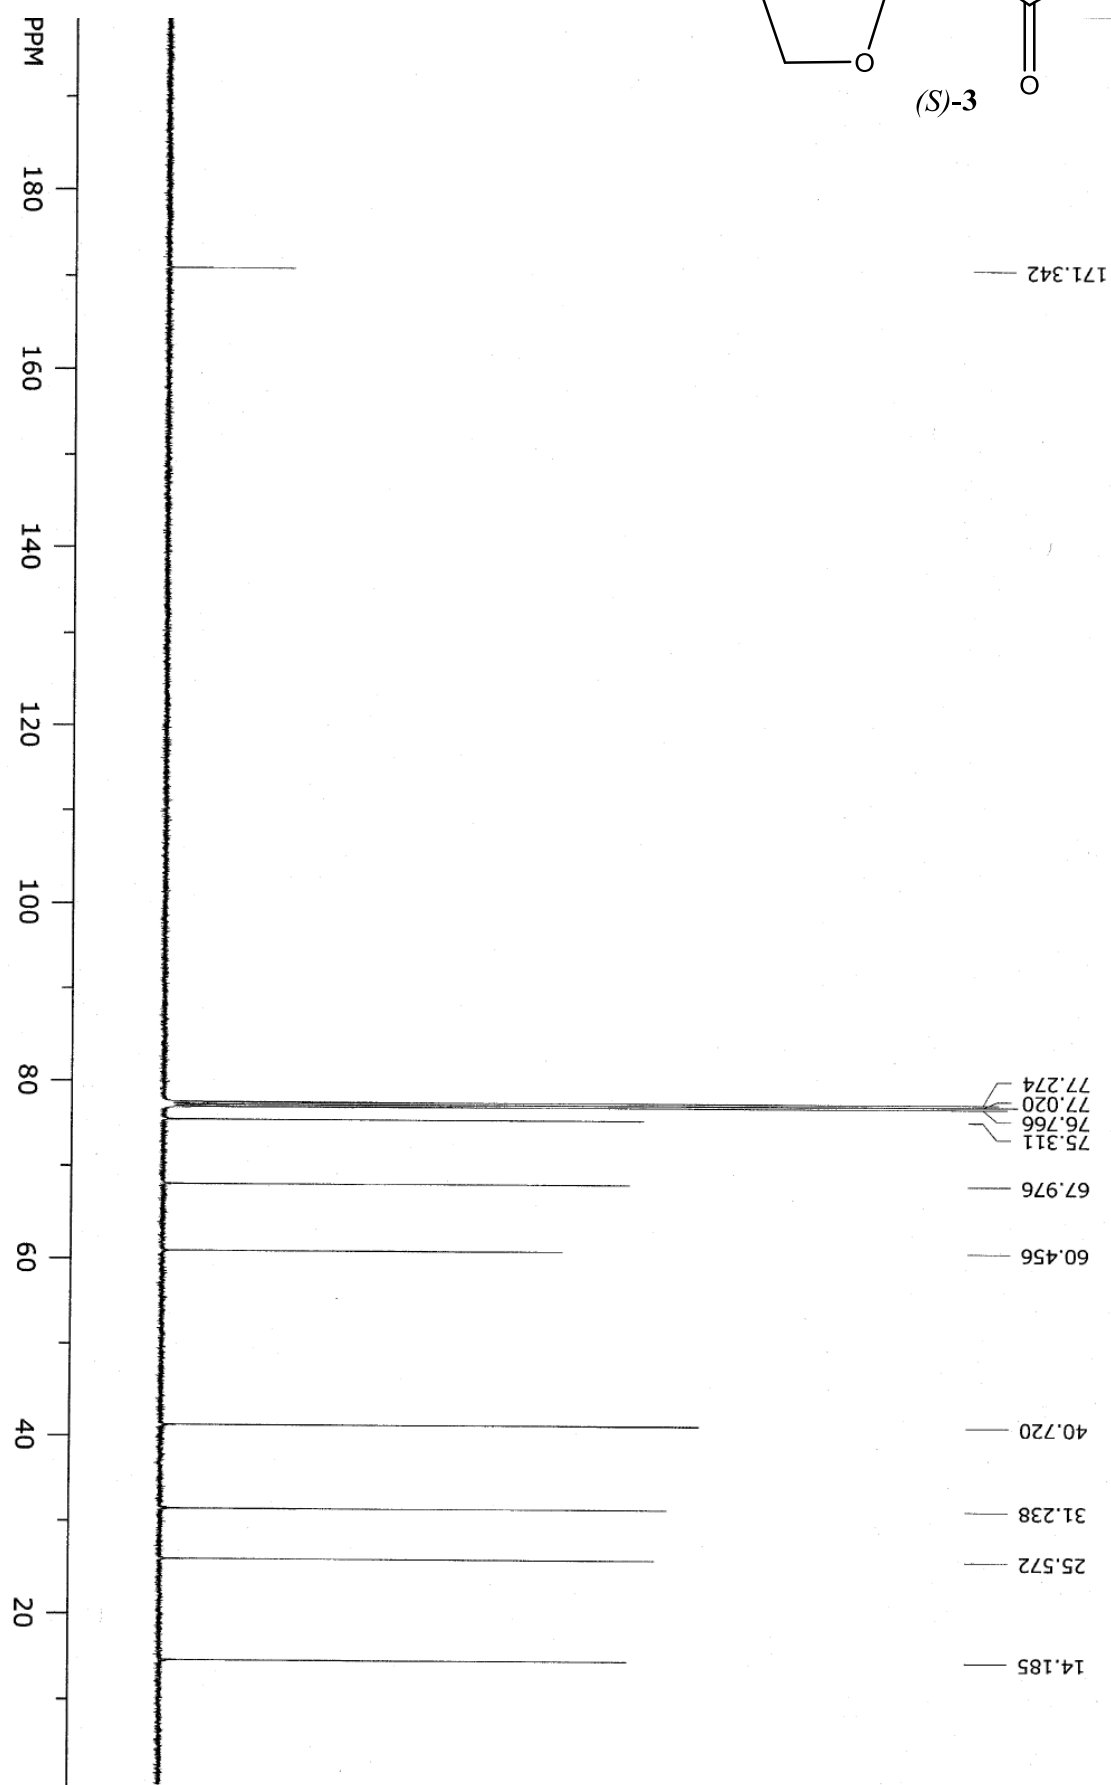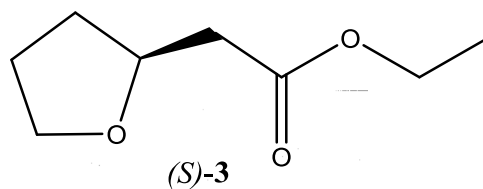

**Figure S11.** ECD spectra of the two enantiomers of **1**

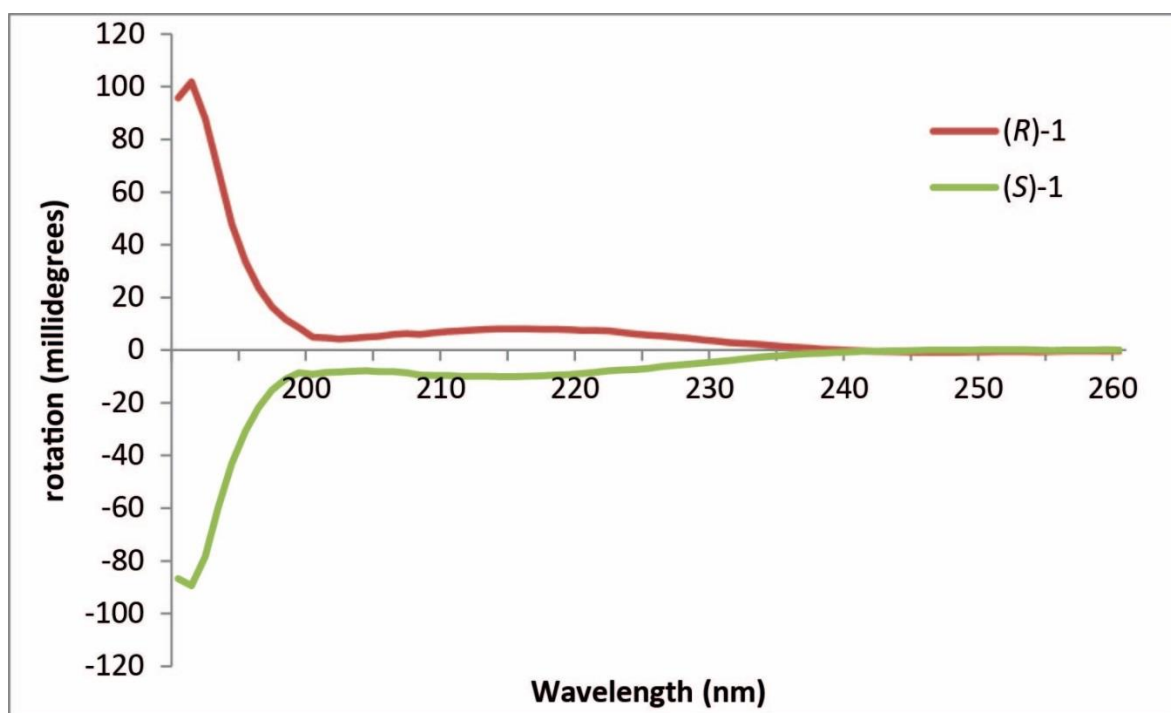

**Figure S12.** GC-MS total ion chromatograms

a) Trace of *C. ovata* methanol extracts with identified compounds labelled.

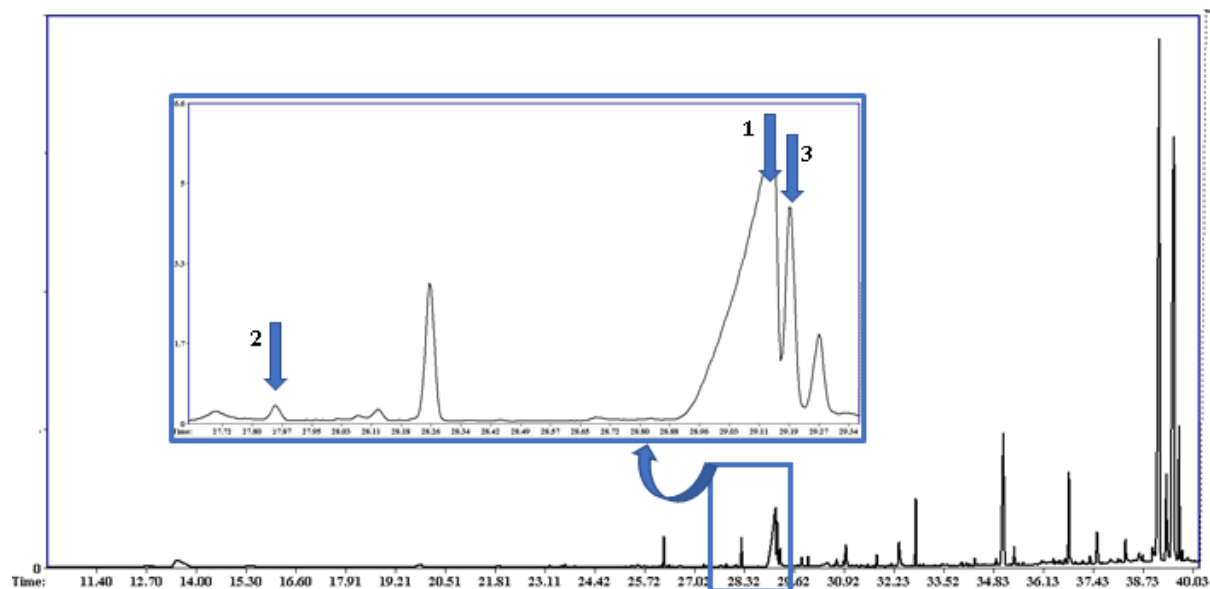

b) Enantioselective GC traces showing floral extract (top), synthetic mixture of **1** (middle) and mass spectrum (bottom).

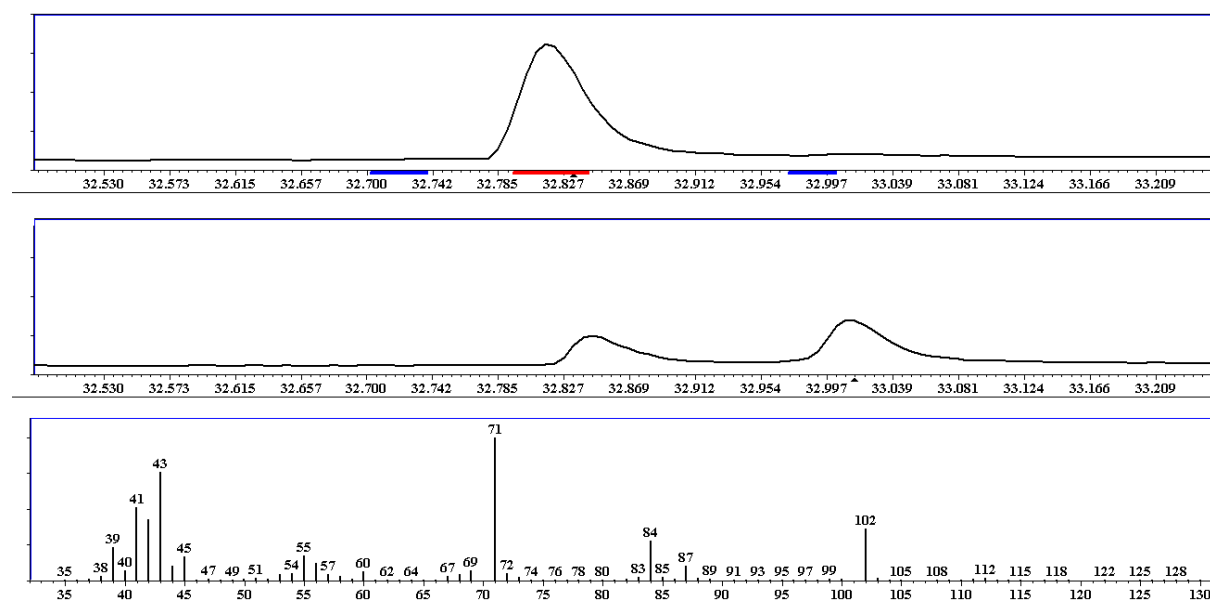

**Table S1.** Additional bioassay experiments

Bioassays were conducted according to the protocol in the main manuscript.

a) Pollinator attraction to floral extracts in different individual solvents

*Cryptostylis ovata* flowers ( $n=3$ ) were extracted in 2 mL of solvent for 24 hours, before the extracts were concentrated to ca 100  $\mu$ L under a gentle stream of nitrogen at roomtemperature. For each solvent (A-D), 10  $\mu$ L of each extract were suspended on a pin. Apart from the individual solvents, a treatment of a combination of all solvents (A-D), on a single pin, was added (3  $\mu$ L of each solvent). In total eight trials were conducted over two days.

| Solvent             | Approaches | Lands | Copulations |
|---------------------|------------|-------|-------------|
| Water(A)            | 68         | 9     | 4           |
| Methanol (B)        | 68         | 8     | 1           |
| Dichloromethane (C) | 70         | 6     | 2           |
| Hexane (D)          | 7          | 0     | 0           |
| Mix of A-D          | 63         | 8     | 3           |

*G*-tests revealed no significant difference in proportion of responses observed to the solvent treatments A-C and Mix - no treatment had a greater proportion of lands or copulations.

b) Comparison of individual solvent extracts, *rac*-1, and negative control (solvent only)

In additions to comparing different extraction solvents, a direct comparison between solvent extracts (as in a), *rac*-1 (at 50  $\mu$ g), and pin with solvent (MeOH, 10  $\mu$ L) only. In total 10 trials were conducted over two days.

| Treatment                   | Approaches | Lands | Copulations |
|-----------------------------|------------|-------|-------------|
| Water(A)                    | 124        | 15    | 1           |
| Methanol (B)                | 156        | 12    | 4           |
| Synthetic <i>rac</i> -1 (C) | 108        | 1     | 0           |
| Blank                       | 3          | 0     | 0           |

c) Dose-response experiment of *rac*-1 (4 trials) and (*S*)-1 (5 trials)

Pins were loaded of various amounts of *rac*-1 and (*S*)-1 to determine the optimal amount for pollinator attraction.

| <i>Rac</i> -1 | Approaches | Lands | ( <i>S</i> )-1 | Approaches | Lands |
|---------------|------------|-------|----------------|------------|-------|
| 100 $\mu$ g   | 24         | 1     | 50 $\mu$ g     | 19         | 0     |
| 10 $\mu$ g    | 11         | 0     | 1 $\mu$ g      | 21         | 1     |
| 1 $\mu$ g     | 30         | 0     | 20 ng          | 23         | 0     |
| 0.1 $\mu$ g   | 32         | 0     | 0.4 ng         | 1          | 0     |
